# Supplementary material
Source: PubMed Central journal article supplement (PMC4450873)
Supplement: NIHMS688289-supplement-Supplemental_Figures.pdf [file NIHMS688289-supplement-Supplemental_Figures.pdf]

Supplemental Figure S1

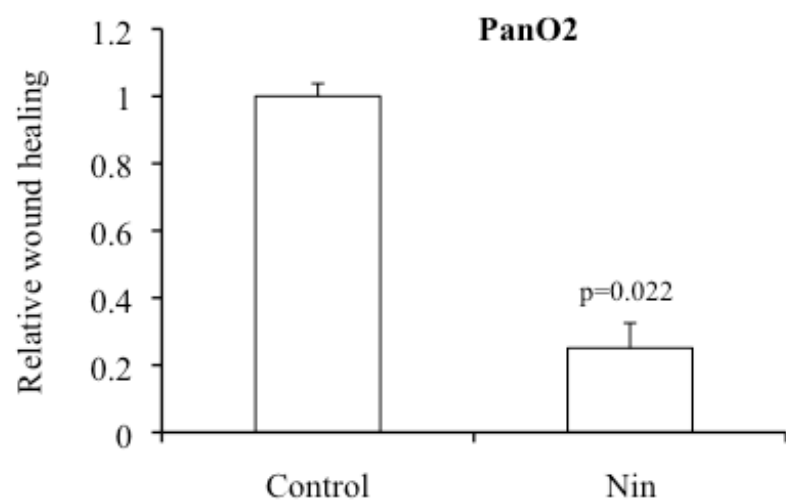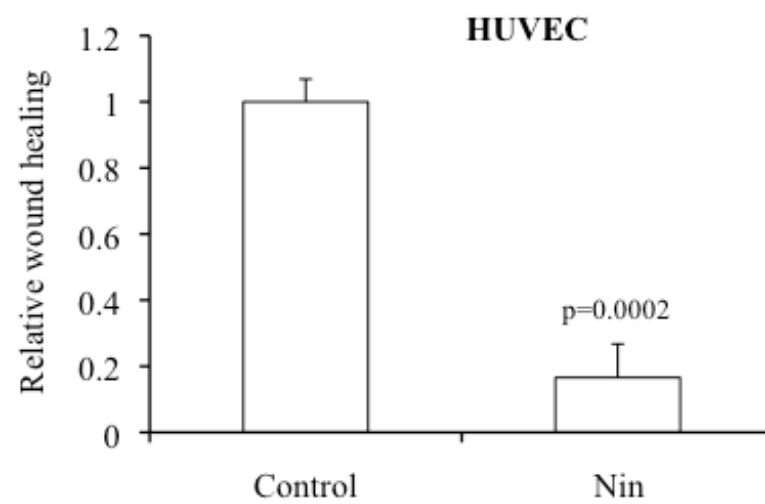

Supplemental Figure S2

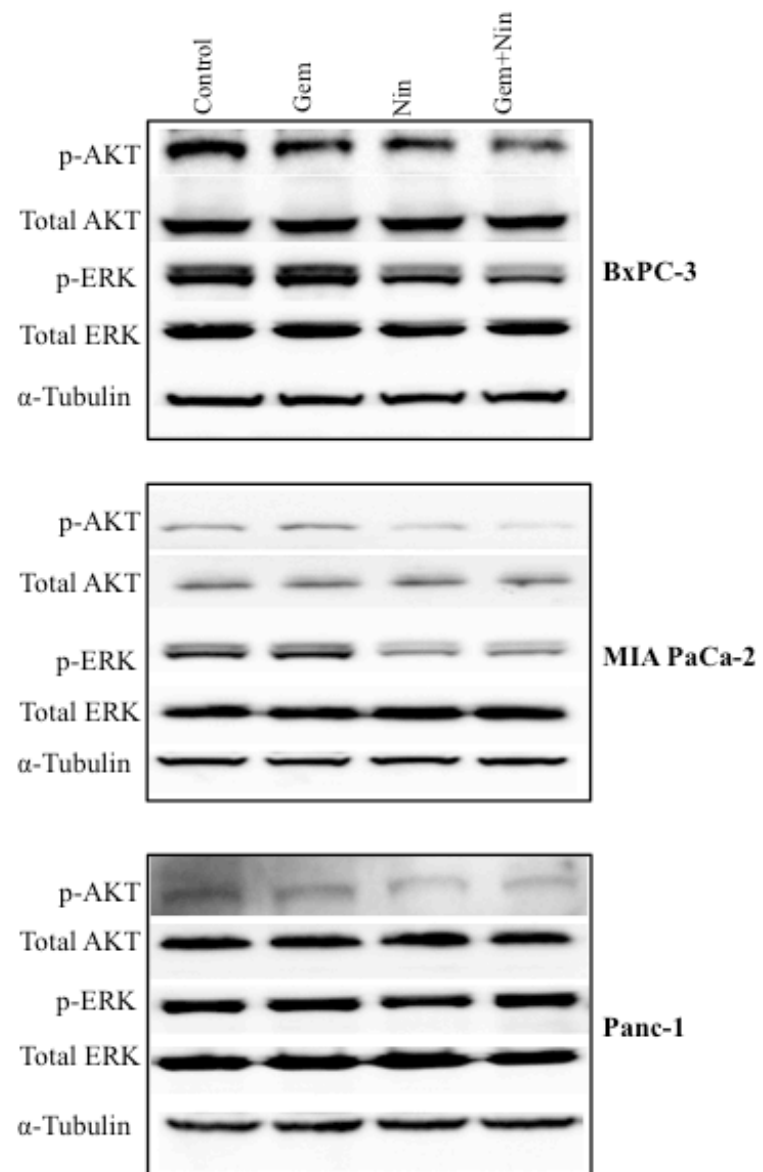

Supplemental Figure S3A

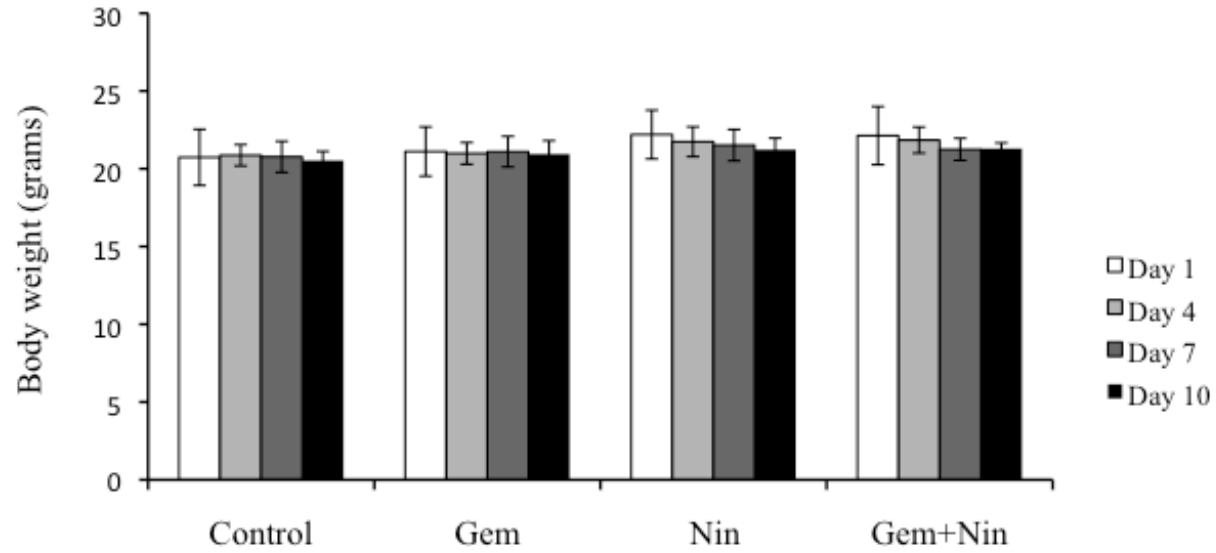

Supplemental Figure S3B

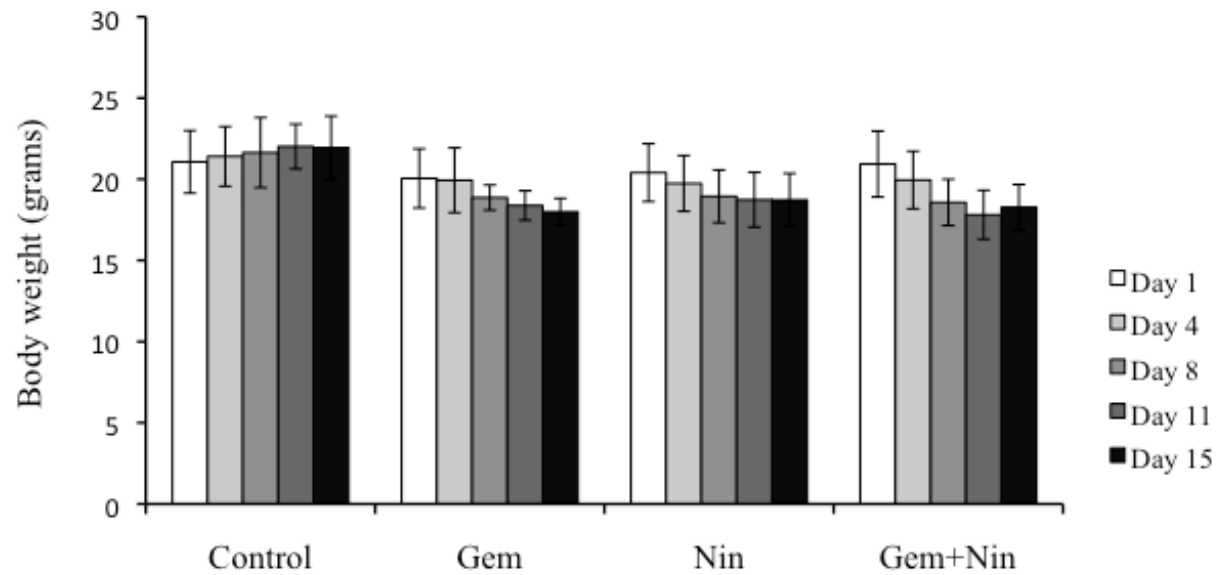

Supplemental Figure S4

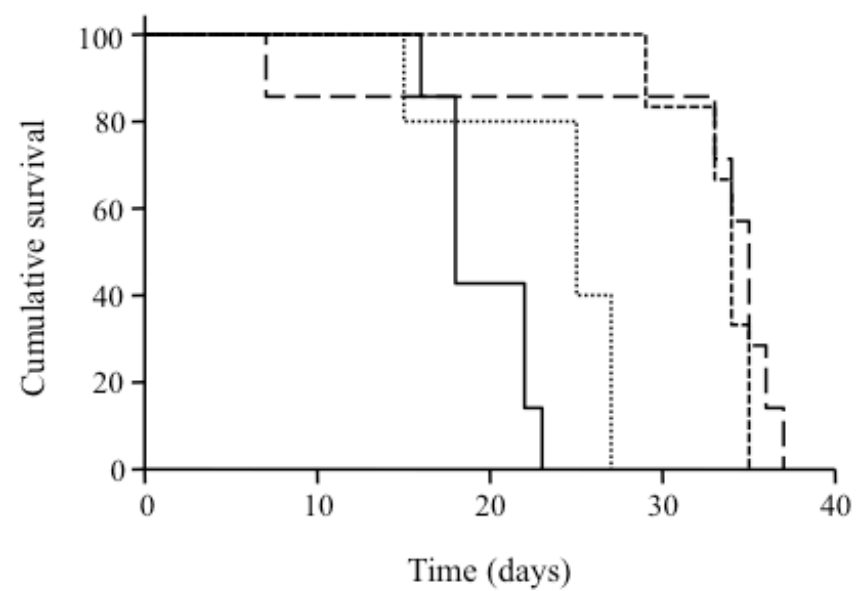

|               | Median<br>Survival (days) | p value versus |       |
|---------------|---------------------------|----------------|-------|
|               |                           | Control        | Gem   |
| — Control     | 18                        |                |       |
| ..... Gem     | 25                        | 0.02           |       |
| ----- Nin     | 34                        | 0.0004         | 0.001 |
| - - - Gem+Nin | 35                        | 0.004          | 0.01  |
